# Supplementary material for: Unveiling distinct bonding patterns in noble gas hydrides via interference energy analysis
Source: Royal Society of Chemistry journal article supplement (doi:10.1039/d4cp04028g), 2024-11-04
Supplement: d4cp04028g1.pdf [file d4cp04028g1.pdf]

## Supporting Information

### **Unveiling distinct bonding patterns in noble gas hydrides via interference energy analysis**

*Lucas Araujo,<sup>a,b</sup> Marco A. C. Nascimento,<sup>a</sup> Thiago M. Cardozo<sup>\*a</sup> and Felipe Fantuzzi<sup>\*c</sup>*

- a. Instituto de Química, Universidade Federal do Rio de Janeiro, Av. Athos da Silveira Ramos, 149, CT, A-622, Cid. Univ., Rio de Janeiro, RJ 21941-909, Brazil.  
E-mail: [thiago@iq.ufrj.br](mailto:thiago@iq.ufrj.br)
- b. Center for Theoretical Chemistry, Faculty of Chemistry and Biochemistry, Ruhr University Bochum, Universitätsstraße 150, 44801 Bochum, Germany.
- c. School of Chemistry and Forensic Science, University of Kent, Park Wood Rd, Canterbury CT2 7NH, UK.  
E-mail: [f.fantuzzi@kent.ac.uk](mailto:f.fantuzzi@kent.ac.uk)

### Table of Contents

|                                                                           |           |
|---------------------------------------------------------------------------|-----------|
| <b>1. Optimization and frequencies: CCSD(T)/aug-cc-pVTZ results .....</b> | <b>S2</b> |
| <b>2. Orbital extents and orbital plots .....</b>                         | <b>S3</b> |
| <b>3. CCSD(T) potential energy curves .....</b>                           | <b>S5</b> |
| <b>4. SCGVB potential energy curves and the GPF-EP results .....</b>      | <b>S8</b> |

## 1. Optimization and frequencies: CCSD(T)/aug-cc-pVTZ results

**Table S1:** Molecular parameters calculated at the CCSD(T)/aug-cc-pVTZ level. Bond lengths, absolute energies, zero-point energy (zpe) and fundamental vibrational frequencies.

| Species          | Bond length (Å) | Energy (a.u.)     | ZPE (a.u.) | Frequencies (cm <sup>-1</sup> ) |
|------------------|-----------------|-------------------|------------|---------------------------------|
| HeH <sup>+</sup> | 0.77615         | -2.975393255079   | 0.00730227 | 3205.33                         |
| NeH <sup>+</sup> | 0.99234         | -128.897819263410 | 0.00671000 | 2945.35                         |
| ArH <sup>+</sup> | 1.28211         | -527.199804389098 | 0.00621645 | 2728.70                         |

## 2. Orbital extents and orbital plots

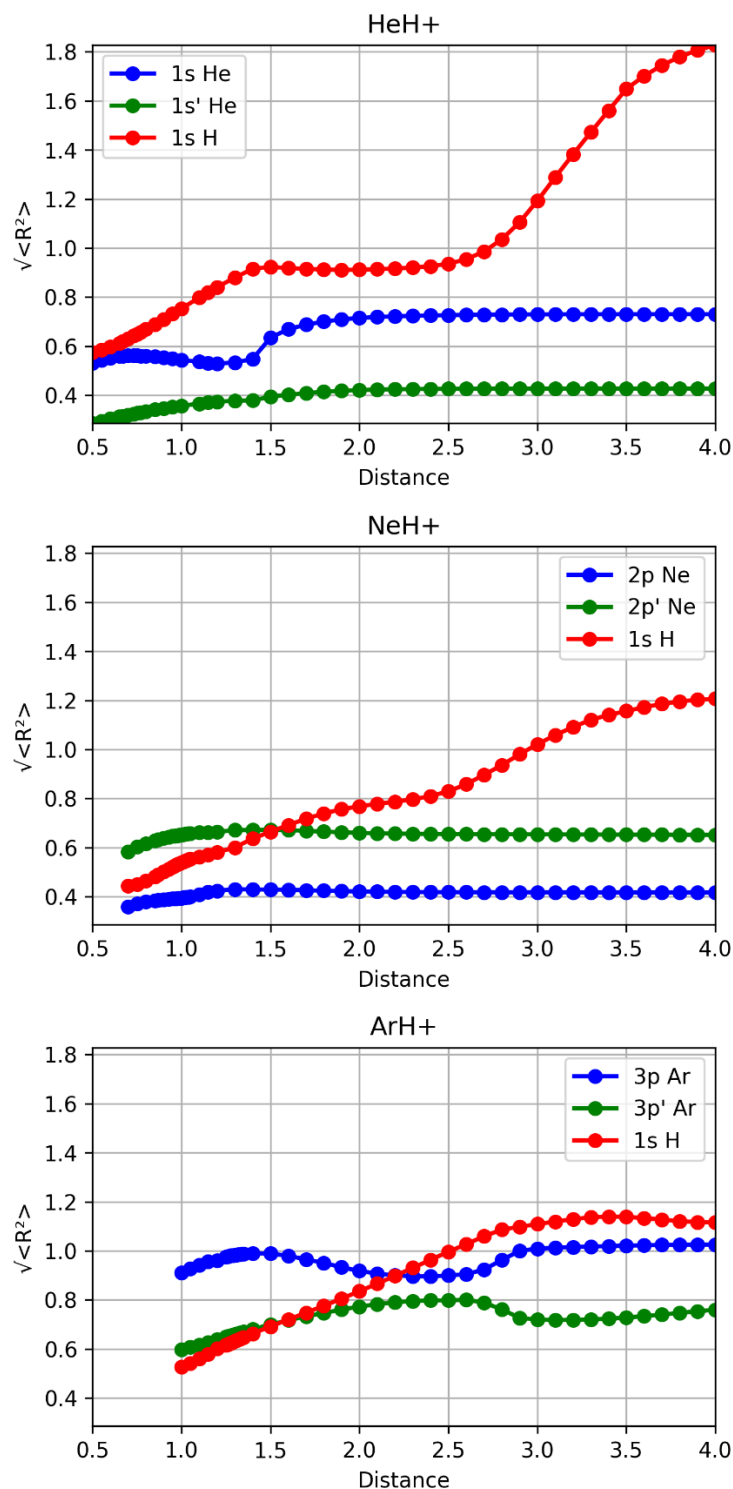

**Figure S1:** SCGVB orbital extents derived from the square root of  $\langle R^2 \rangle$ , calculated at the SCGVB(2,3)/aug-cc-pVTZ level across various interatomic distances (in Å) for the  $\text{NgH}^+$  species discussed.

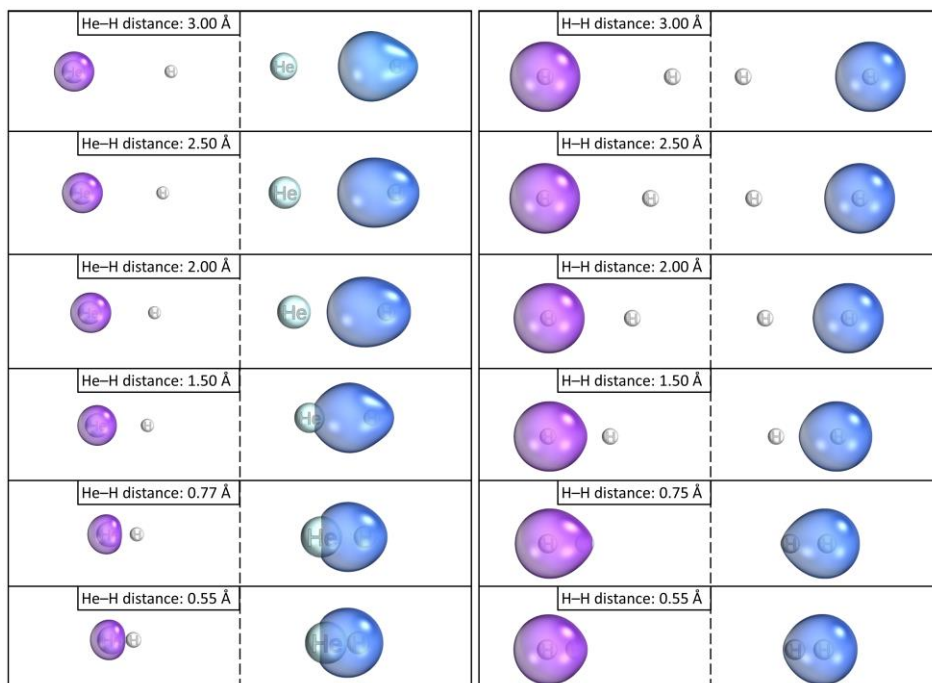

**Figure S2:** SCGVb/aug-cc-pVTZ orbitals for  $\text{HeH}^+$  and  $\text{H}_2$  at various interatomic distances along their potential energy curves. For helium, only the orbital with the largest overlap with the hydrogen 1s orbital at the energy minimum is shown for simplicity.

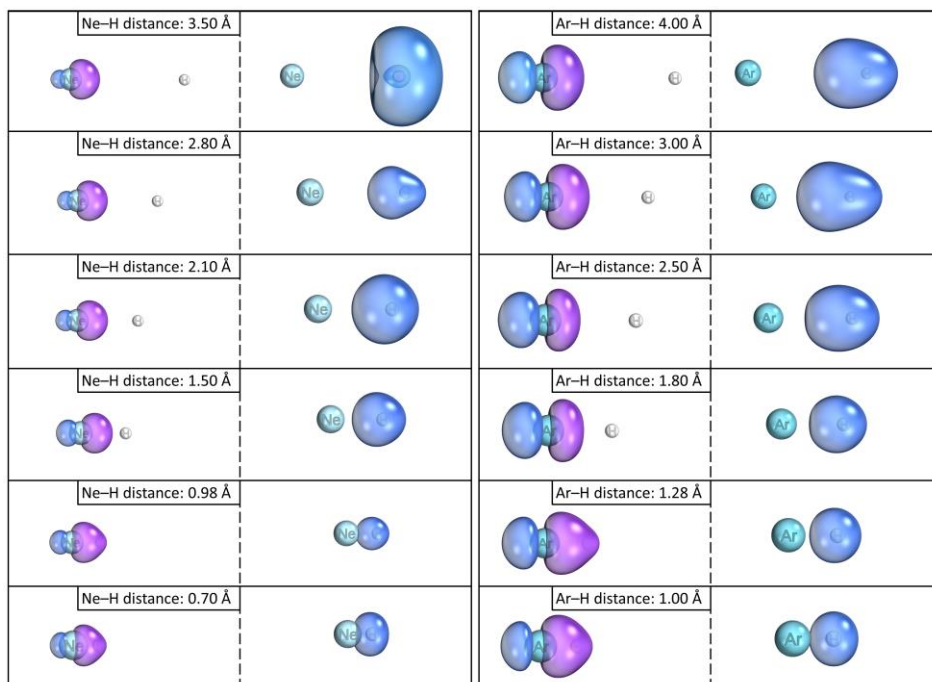

**Figure S3:** SCGVb/aug-cc-pVTZ orbitals for  $\text{NeH}^+$  and  $\text{ArH}^+$  at various interatomic distances along their potential energy curves. For the noble gases, only the orbital with the largest overlap with the hydrogen 1s orbital at the energy minimum is shown for simplicity.

### 3. CCSD(T) potential energy curves

**Table S2:** CCSD(T)/aug-cc-pVTZ potential energy curves for HeH<sup>+</sup>, NeH<sup>+</sup> and ArH<sup>+</sup>. Distances are given in angstroms (Å) and the absolute energies in atomic units (a.u.).

| Distance He-H (Å) | Energy (a.u.) | Distance Ne-H (Å) | Energy (a.u.) | Distance Ar-H (Å) | Energy (a.u.) |
|-------------------|---------------|-------------------|---------------|-------------------|---------------|
| 0.500             | -2.87130819   | 0.700             | -128.78169613 | 1.000             | -527.12668563 |
| 0.596             | -2.94384602   | 0.794             | -128.85849052 | 1.091             | -527.17263314 |
| 0.692             | -2.97031901   | 0.888             | -128.88960251 | 1.182             | -527.19368149 |
| 0.788             | -2.97531871   | 0.982             | -128.89775531 | 1.273             | -527.19976012 |
| 0.884             | -2.97054994   | 1.076             | -128.89467103 | 1.364             | -527.19700318 |
| 0.980             | -2.96180211   | 1.170             | -128.88654098 | 1.455             | -527.18923940 |
| 1.076             | -2.95199760   | 1.264             | -128.87662010 | 1.545             | -527.17885075 |
| 1.172             | -2.94258548   | 1.358             | -128.86657701 | 1.636             | -527.16729878 |
| 1.268             | -2.93422728   | 1.452             | -128.85724291 | 1.727             | -527.15546603 |
| 1.364             | -2.92715529   | 1.545             | -128.84900354 | 1.818             | -527.14387788 |
| 1.460             | -2.92136937   | 1.639             | -128.84198605 | 1.909             | -527.13284022 |
| 1.556             | -2.91675096   | 1.733             | -128.83616231 | 2.000             | -527.12252478 |
| 1.652             | -2.91313090   | 1.827             | -128.83141837 | 2.091             | -527.11302021 |
| 1.747             | -2.91033018   | 1.921             | -128.82760528 | 2.182             | -527.10436349 |
| 1.843             | -2.90818230   | 2.015             | -128.82457060 | 2.273             | -527.09655930 |
| 1.939             | -2.90654354   | 2.109             | -128.82217472 | 2.364             | -527.08959168 |
| 2.035             | -2.90529564   | 2.203             | -128.82029390 | 2.455             | -527.08343073 |
| 2.131             | -2.90434442   | 2.297             | -128.81882213 | 2.545             | -527.07803745 |
| 2.227             | -2.90361659   | 2.391             | -128.81767055 | 2.636             | -527.07336201 |
| 2.323             | -2.90305623   | 2.485             | -128.81676691 | 2.727             | -527.06935026 |
| 2.419             | -2.90262128   | 2.579             | -128.81605424 | 2.818             | -527.06594236 |
| 2.515             | -2.90228047   | 2.673             | -128.81548864 | 2.909             | -527.06307512 |
| 2.611             | -2.90201066   | 2.767             | -128.81503664 | 3.000             | -527.06068393 |
| 2.707             | -2.90179481   | 2.861             | -128.81467269 | 3.091             | -527.05870516 |
| 2.803             | -2.90162028   | 2.955             | -128.81437718 | 3.182             | -527.05707740 |
| 2.899             | -2.90147777   | 3.048             | -128.81413500 | 3.273             | -527.05574421 |
| 2.995             | -2.90136029   | 3.142             | -128.81393455 | 3.364             | -527.05465496 |
| 3.091             | -2.90126258   | 3.236             | -128.81376698 | 3.455             | -527.05376551 |
| 3.187             | -2.90118064   | 3.330             | -128.81362562 | 3.545             | -527.05303836 |
| 3.283             | -2.90111140   | 3.424             | -128.81350549 | 3.636             | -527.05244224 |
| 3.379             | -2.90105246   | 3.518             | -128.81340287 | 3.727             | -527.05195148 |
| 3.475             | -2.90100193   | 3.612             | -128.81331488 | 3.818             | -527.05154531 |
| 3.571             | -2.90095833   | 3.706             | -128.81323929 | 3.909             | -527.05120702 |
| 3.667             | -2.90092049   | 3.800             | -128.81317425 | 4.000             | -527.05092330 |
| 3.763             | -2.90088747   | 3.894             | -128.81311819 | 4.091             | -527.05068356 |
| 3.859             | -2.90085848   | 3.988             | -128.81306976 | 4.182             | -527.05047945 |
| 3.955             | -2.90083303   | 4.082             | -128.81302778 | 4.273             | -527.05030437 |
| 4.051             | -2.90081058   | 4.176             | -128.81299126 | 4.364             | -527.05015313 |
| 4.146             | -2.90079072   | 4.270             | -128.81295934 | 4.455             | -527.05002162 |
| 4.242             | -2.90077313   | 4.364             | -128.81293131 | 4.545             | -527.04990658 |
| 4.338             | -2.90075751   | 4.458             | -128.81290657 | 4.636             | -527.04980541 |

|       |             |       |               |       |               |
|-------|-------------|-------|---------------|-------|---------------|
| 4.434 | -2.90074361 | 4.552 | -128.81288463 | 4.727 | -527.04971600 |
| 4.530 | -2.90073121 | 4.645 | -128.81286474 | 4.818 | -527.04963665 |
| 4.626 | -2.90072013 | 4.739 | -128.81284726 | 4.909 | -527.04956595 |
| 4.722 | -2.90071021 | 4.833 | -128.81283156 | 5.000 | -527.04950272 |
| 4.818 | -2.90070129 | 4.927 | -128.81281741 | 5.091 | -527.04944600 |
| 4.914 | -2.90069326 | 5.021 | -128.81280463 | 5.182 | -527.04939495 |
| 5.010 | -2.90068601 | 5.115 | -128.81279305 | 5.273 | -527.04934889 |
| 5.106 | -2.90067945 | 5.209 | -128.81278253 | 5.364 | -527.04930716 |
| 5.202 | -2.90067350 | 5.303 | -128.81277295 | 5.455 | -527.04926925 |
| 5.298 | -2.90066809 | 5.397 | -128.81276421 | 5.545 | -527.04923476 |
| 5.394 | -2.90066315 | 5.491 | -128.81275623 | 5.636 | -527.04920325 |
| 5.490 | -2.90065865 | 5.585 | -128.81274892 | 5.727 | -527.04917444 |
| 5.586 | -2.90065453 | 5.679 | -128.81274222 | 5.818 | -527.04914801 |
| 5.682 | -2.90065076 | 5.773 | -128.81273606 | 5.909 | -527.04912372 |
| 5.778 | -2.90064729 | 5.867 | -128.81273039 | 6.000 | -527.04910134 |
| 5.874 | -2.90064411 | 5.961 | -128.81272518 | 6.091 | -527.04908069 |
| 5.970 | -2.90064117 | 6.055 | -128.81272036 | 6.182 | -527.04906161 |
| 6.066 | -2.90063847 | 6.148 | -128.81271592 | 6.273 | -527.04904393 |
| 6.162 | -2.90063597 | 6.242 | -128.81271181 | 6.364 | -527.04902754 |
| 6.258 | -2.90063367 | 6.336 | -128.81270800 | 6.455 | -527.04901233 |
| 6.354 | -2.90063153 | 6.430 | -128.81270447 | 6.545 | -527.04899818 |
| 6.449 | -2.90062955 | 6.524 | -128.81270120 | 6.636 | -527.04898501 |
| 6.545 | -2.90062772 | 6.618 | -128.81269815 | 6.727 | -527.04897273 |
| 6.641 | -2.90062601 | 6.712 | -128.81269532 | 6.818 | -527.04896129 |
| 6.737 | -2.90062443 | 6.806 | -128.81269269 | 6.909 | -527.04895059 |
| 6.833 | -2.90062296 | 6.900 | -128.81269024 | 7.000 | -527.04894060 |
| 6.929 | -2.90062159 | 6.994 | -128.81268795 | 7.091 | -527.04893126 |
| 7.025 | -2.90062031 | 7.088 | -128.81268581 | 7.182 | -527.04892250 |
| 7.121 | -2.90061911 | 7.182 | -128.81268381 | 7.273 | -527.04891430 |
| 7.217 | -2.90061800 | 7.276 | -128.81268195 | 7.364 | -527.04890660 |
| 7.313 | -2.90061695 | 7.370 | -128.81268020 | 7.455 | -527.04889938 |
| 7.409 | -2.90061598 | 7.464 | -128.81267856 | 7.545 | -527.04889259 |
| 7.505 | -2.90061506 | 7.558 | -128.81267703 | 7.636 | -527.04888621 |
| 7.601 | -2.90061421 | 7.652 | -128.81267559 | 7.727 | -527.04888021 |
| 7.697 | -2.90061340 | 7.745 | -128.81267423 | 7.818 | -527.04887455 |
| 7.793 | -2.90061265 | 7.839 | -128.81267296 | 7.909 | -527.04886923 |
| 7.889 | -2.90061194 | 7.933 | -128.81267176 | 8.000 | -527.04886420 |
| 7.985 | -2.90061127 | 8.027 | -128.81267064 | 8.091 | -527.04885946 |
| 8.081 | -2.90061064 | 8.121 | -128.81266958 | 8.182 | -527.04885499 |
| 8.177 | -2.90061005 | 8.215 | -128.81266858 | 8.273 | -527.04885076 |
| 8.273 | -2.90060950 | 8.309 | -128.81266763 | 8.364 | -527.04884676 |
| 8.369 | -2.90060897 | 8.403 | -128.81266674 | 8.455 | -527.04884297 |
| 8.465 | -2.90060847 | 8.497 | -128.81266590 | 8.545 | -527.04883939 |
| 8.561 | -2.90060801 | 8.591 | -128.81266511 | 8.636 | -527.04883600 |
| 8.657 | -2.90060756 | 8.685 | -128.81266435 | 8.727 | -527.04883278 |
| 8.753 | -2.90060714 | 8.779 | -128.81266364 | 8.818 | -527.04882973 |
| 8.848 | -2.90060675 | 8.873 | -128.81266296 | 8.909 | -527.04882683 |
| 8.944 | -2.90060637 | 8.967 | -128.81266232 | 9.000 | -527.04882409 |
| 9.040 | -2.90060602 | 9.061 | -128.81266172 | 9.091 | -527.04882147 |

|        |             |        |               |        |               |
|--------|-------------|--------|---------------|--------|---------------|
| 9.136  | -2.90060568 | 9.155  | -128.81266114 | 9.182  | -527.04881899 |
| 9.232  | -2.90060536 | 9.248  | -128.81266059 | 9.273  | -527.04881663 |
| 9.328  | -2.90060505 | 9.342  | -128.81266007 | 9.364  | -527.04881438 |
| 9.424  | -2.90060477 | 9.436  | -128.81265958 | 9.455  | -527.04881224 |
| 9.520  | -2.90060449 | 9.530  | -128.81265911 | 9.545  | -527.04881021 |
| 9.616  | -2.90060423 | 9.624  | -128.81265866 | 9.636  | -527.04880827 |
| 9.712  | -2.90060398 | 9.718  | -128.81265824 | 9.727  | -527.04880642 |
| 9.808  | -2.90060375 | 9.812  | -128.81265783 | 9.818  | -527.04880465 |
| 9.904  | -2.90060352 | 9.906  | -128.81265745 | 9.909  | -527.04880296 |
| 10.000 | -2.90060331 | 10.000 | -128.81265708 | 10.000 | -527.04880136 |

#### 4. SCGVB potential energy curves and the GPF-EP results

```
$CONTRL ICHARG=1 MULT=1 SCFTYP=RHF VBTP=VB2000 ISPHER=1 MAXIT=199 $END
$SYSTEM MEMORY=100000000 $END
$BASIS GBASIS=ACCT $END
$DATA
HeH+ SC
C1
HELIUM      2.0      0.000000000      0.000000000      0.000000000
HYDROGEN    1.0      0.77      0.000000000      0.000000000
$END
$VB2000
#! SC(2,3)/aug-cc-pVTZ

HeH+ 1 GROUPS (1 Spin-Coupled(2,3) Group)

$01LENHANCE
3
1,1,1
2,1,1
3,1,2

$GPFEP
partition_0.77.txt dmatrix_0.77.txt

$READGUESS
heh_0.75.guess

$WRITEGUESS
heh_0.77.guess

$MACROITER
250

$MOLDEN

$END
```

**Figure S4:** Example of an input file for VB2000, as distributed with GAMESS, used for the SCGVB calculations.



```

=====
Generalized Product Function Energy Partitioning - GPF-EP
Version 1.0 - August, 2021
=====

GROUP CONTRIBUTIONS

          T[I]          Ven[I]          T[QC]          Ven[QC]
-----
GROUP 1 +   -0.830824    0.113537    3.798203    -8.387984

          Vee[I]          Vee[QC]          Vee[II]
-----
GROUP 1 -    0.017143    0.953943    0.001784

INDIVIDUAL ORBITAL PAIR CONTRIBUTION TO INTERFERENCE - GROUP 1

          T[I]          Ven[I]          Vee[I]
-----
P( 1, 2) -   -0.144756    -0.098020    0.016442
P( 1, 3) -   -0.289571    0.108737    -0.009432
P( 2, 3) -   -0.396497    0.102820    0.010133

TOTAL ENERGY =   -2.959712
=====
TOTAL E[I] =   -0.700144
TOTAL E[REF] =  -2.261352
TOTAL E[X] =    0.000000
TOTAL E[II] =    0.001784

OCCUPATION NUMBERS
=====
GROUP 1
-----
ORB 1  0.747209
ORB 2  0.622250
ORB 3  0.630541

```

**Figure S5:** Example of a partition file generated by the GPF-EP module of VB2000.

**Table S3:** IEA data for HeH<sup>+</sup> at the SCGV(2,3)/aug-cc-pVTZ level.

| Dist He-H | E[TOT]    | T[TOT]   | V[TOT]    | E[I]      | T[I]      | V[I]      | E[QC]     | T[QC]    | V[QC]     |
|-----------|-----------|----------|-----------|-----------|-----------|-----------|-----------|----------|-----------|
| 0.50      | -2.855123 | 3.424664 | -6.279787 | -0.91049  | -0.818277 | -0.092213 | -1.946452 | 4.242941 | -6.189393 |
| 0.55      | -2.901199 | 3.297388 | -6.198587 | -0.846194 | -0.849164 | 0.00297   | -2.056611 | 4.146552 | -6.203163 |
| 0.60      | -2.929822 | 3.193851 | -6.123673 | -0.801251 | -0.851634 | 0.050383  | -2.130184 | 4.045485 | -6.175669 |
| 0.65      | -2.946719 | 3.109768 | -6.056487 | -0.765925 | -0.845692 | 0.079768  | -2.182468 | 3.95546  | -6.137928 |
| 0.67      | -2.951093 | 3.080777 | -6.03187  | -0.756029 | -0.839995 | 0.083965  | -2.19677  | 3.920772 | -6.117541 |
| 0.70      | -2.955696 | 3.041583 | -5.997279 | -0.738719 | -0.835577 | 0.096857  | -2.218716 | 3.87716  | -6.095875 |
| 0.73      | -2.958393 | 3.007071 | -5.965464 | -0.721781 | -0.832756 | 0.110975  | -2.238376 | 3.839827 | -6.078203 |
| 0.75      | -2.959335 | 2.986386 | -5.945721 | -0.710859 | -0.83146  | 0.120601  | -2.25025  | 3.817846 | -6.068097 |
| 0.77      | -2.959712 | 2.967379 | -5.927091 | -0.700144 | -0.830824 | 0.13068   | -2.261352 | 3.798203 | -6.059555 |
| 0.80      | -2.959403 | 2.941784 | -5.901187 | -0.685236 | -0.830475 | 0.14524   | -2.275971 | 3.772259 | -6.048231 |
| 0.85      | -2.957124 | 2.905908 | -5.863032 | -0.663539 | -0.830682 | 0.167143  | -2.295442 | 3.73659  | -6.032032 |
| 0.90      | -2.953349 | 2.877297 | -5.830646 | -0.645248 | -0.830829 | 0.185582  | -2.310004 | 3.708126 | -6.018131 |
| 0.95      | -2.948673 | 2.854783 | -5.803456 | -0.6293   | -0.831225 | 0.201925  | -2.321304 | 3.686008 | -6.007312 |
| 1.00      | -2.943511 | 2.837323 | -5.780834 | -0.614671 | -0.831871 | 0.2172    | -2.330795 | 3.669194 | -5.999989 |
| 1.10      | -2.932784 | 2.814496 | -5.74728  | -0.590651 | -0.830494 | 0.239844  | -2.344126 | 3.64499  | -5.989116 |
| 1.15      | -2.927557 | 2.807852 | -5.735409 | -0.579286 | -0.829231 | 0.249945  | -2.350264 | 3.637083 | -5.987347 |
| 1.20      | -2.922549 | 2.803633 | -5.726182 | -0.568649 | -0.825533 | 0.256884  | -2.355899 | 3.629166 | -5.985065 |
| 1.30      | -2.913376 | 2.801033 | -5.714409 | -0.546994 | -0.807103 | 0.260108  | -2.368392 | 3.608136 | -5.976528 |
| 1.40      | -2.905393 | 2.80419  | -5.709583 | -0.517134 | -0.76362  | 0.246486  | -2.390259 | 3.56781  | -5.958069 |
| 1.50      | -2.897556 | 2.820207 | -5.717763 | -0.349012 | -0.483171 | 0.134159  | -2.549782 | 3.303378 | -5.85316  |
| 1.60      | -2.892806 | 2.829043 | -5.721849 | -0.300206 | -0.414643 | 0.114436  | -2.593579 | 3.243686 | -5.837265 |
| 1.70      | -2.889164 | 2.837551 | -5.726715 | -0.271552 | -0.378749 | 0.107197  | -2.618423 | 3.2163   | -5.834724 |
| 1.80      | -2.886399 | 2.845366 | -5.731765 | -0.252368 | -0.353902 | 0.101533  | -2.634724 | 3.199268 | -5.833991 |
| 1.90      | -2.884318 | 2.851951 | -5.736269 | -0.239783 | -0.335836 | 0.096052  | -2.645152 | 3.187787 | -5.832939 |
| 2.00      | -2.882757 | 2.857458 | -5.740215 | -0.232222 | -0.323661 | 0.09144   | -2.651108 | 3.181119 | -5.832227 |
| 2.10      | -2.881586 | 2.861815 | -5.743401 | -0.227664 | -0.315246 | 0.087581  | -2.654468 | 3.177061 | -5.831529 |
| 2.20      | -2.880702 | 2.865364 | -5.746066 | -0.224926 | -0.309418 | 0.084492  | -2.656308 | 3.174782 | -5.831091 |
| 2.30      | -2.88003  | 2.868049 | -5.748079 | -0.223219 | -0.30525  | 0.082031  | -2.657336 | 3.173299 | -5.830635 |
| 2.40      | -2.879517 | 2.870143 | -5.74966  | -0.222131 | -0.302238 | 0.080106  | -2.657907 | 3.172381 | -5.830287 |
| 2.50      | -2.87912  | 2.871784 | -5.750904 | -0.221416 | -0.300039 | 0.078623  | -2.658224 | 3.171823 | -5.830046 |
| 2.60      | -2.87881  | 2.873055 | -5.751865 | -0.220937 | -0.298431 | 0.077494  | -2.658391 | 3.171486 | -5.829878 |
| 2.70      | -2.878565 | 2.874049 | -5.752614 | -0.220609 | -0.297258 | 0.076648  | -2.658474 | 3.171307 | -5.82978  |
| 2.80      | -2.878369 | 2.874829 | -5.753198 | -0.220382 | -0.296411 | 0.076029  | -2.658505 | 3.17124  | -5.829745 |
| 2.90      | -2.878211 | 2.875452 | -5.753663 | -0.22022  | -0.295803 | 0.075583  | -2.658509 | 3.171255 | -5.829764 |
| 3.00      | -2.878082 | 2.875949 | -5.754031 | -0.220104 | -0.295375 | 0.075271  | -2.658497 | 3.171324 | -5.82982  |
| 3.10      | -2.877976 | 2.876351 | -5.754327 | -0.220021 | -0.295081 | 0.075061  | -2.658474 | 3.171432 | -5.829907 |
| 3.20      | -2.877888 | 2.87668  | -5.754568 | -0.219961 | -0.294885 | 0.074924  | -2.658445 | 3.171565 | -5.830011 |
| 3.30      | -2.877814 | 2.87695  | -5.754764 | -0.219921 | -0.29476  | 0.074839  | -2.658411 | 3.17171  | -5.830122 |
| 3.40      | -2.877751 | 2.877176 | -5.754927 | -0.219896 | -0.294685 | 0.074789  | -2.658373 | 3.171861 | -5.830235 |
| 3.50      | -2.877697 | 2.877364 | -5.755061 | -0.219881 | -0.294645 | 0.074764  | -2.658334 | 3.172009 | -5.830344 |

|      |           |          |           |           |           |          |           |          |           |
|------|-----------|----------|-----------|-----------|-----------|----------|-----------|----------|-----------|
| 3.60 | -2.877652 | 2.87752  | -5.755172 | -0.219875 | -0.294627 | 0.074751 | -2.658295 | 3.172147 | -5.830442 |
| 3.70 | -2.877612 | 2.877653 | -5.755265 | -0.219877 | -0.294626 | 0.074749 | -2.658254 | 3.172279 | -5.830532 |
| 3.80 | -2.877578 | 2.877769 | -5.755347 | -0.219884 | -0.294639 | 0.074755 | -2.658213 | 3.172408 | -5.83062  |
| 3.90 | -2.877549 | 2.877866 | -5.755415 | -0.219895 | -0.294661 | 0.074766 | -2.658173 | 3.172527 | -5.830699 |
| 4.00 | -2.877523 | 2.877953 | -5.755476 | -0.219907 | -0.294688 | 0.07478  | -2.658134 | 3.172641 | -5.830774 |

**Table S4:** IEA data for NeH<sup>+</sup> at the SCGVB(2,3)/aug-cc-pVTZ level.

| Distance<br>Ne-H | E[TOT]      | T[TOT]     | V[TOT]      | E[I]      | T[I]      | V[I]     | E[QC]       | T[QC]      | V[QC]       |
|------------------|-------------|------------|-------------|-----------|-----------|----------|-------------|------------|-------------|
| 0.70             | -128.528523 | 129.333642 | -257.862165 | -0.851093 | -1.340546 | 0.489453 | -127.679037 | 130.674188 | -258.353225 |
| 0.75             | -128.575662 | 129.129926 | -257.705588 | -0.799015 | -1.294266 | 0.49525  | -127.778361 | 130.424192 | -258.202553 |
| 0.80             | -128.605614 | 128.970506 | -257.57612  | -0.751815 | -1.249573 | 0.497758 | -127.855611 | 130.220079 | -258.075689 |
| 0.85             | -128.623675 | 128.845758 | -257.469433 | -0.707638 | -1.202792 | 0.495155 | -127.917925 | 130.04855  | -257.966476 |
| 0.87             | -128.628439 | 128.803842 | -257.432281 | -0.69225  | -1.190437 | 0.498187 | -127.938103 | 129.994279 | -257.932382 |
| 0.90             | -128.633508 | 128.748176 | -257.381684 | -0.668085 | -1.16368  | 0.495596 | -127.967366 | 129.911856 | -257.879222 |
| 0.93             | -128.636541 | 128.700149 | -257.33669  | -0.644385 | -1.135589 | 0.491204 | -127.994115 | 129.835738 | -257.829853 |
| 0.95             | -128.63764  | 128.671859 | -257.309499 | -0.62897  | -1.117515 | 0.488545 | -128.010632 | 129.789374 | -257.800006 |
| 0.96             | -128.637956 | 128.65873  | -257.296686 | -0.622046 | -1.110649 | 0.488603 | -128.017874 | 129.769379 | -257.787252 |
| 0.97             | -128.638127 | 128.646238 | -257.284365 | -0.614693 | -1.102343 | 0.48765  | -128.025395 | 129.748581 | -257.773976 |
| 0.98             | -128.638164 | 128.634354 | -257.272518 | -0.606967 | -1.092758 | 0.485791 | -128.033153 | 129.727112 | -257.760266 |
| 0.99             | -128.638077 | 128.622983 | -257.26106  | -0.598807 | -1.081562 | 0.482754 | -128.041218 | 129.704545 | -257.745762 |
| 1.00             | -128.637875 | 128.612367 | -257.250242 | -0.590174 | -1.068664 | 0.47849  | -128.049638 | 129.681031 | -257.730668 |
| 1.01             | -128.637567 | 128.602156 | -257.239723 | -0.58121  | -1.055238 | 0.474029 | -128.058279 | 129.657394 | -257.715673 |
| 1.02             | -128.637162 | 128.592459 | -257.229621 | -0.571749 | -1.040338 | 0.468589 | -128.067313 | 129.632797 | -257.700111 |
| 1.03             | -128.636668 | 128.583312 | -257.21998  | -0.562245 | -1.025412 | 0.463167 | -128.076303 | 129.608724 | -257.685026 |
| 1.04             | -128.636091 | 128.57453  | -257.210621 | -0.551951 | -1.008595 | 0.456644 | -128.085988 | 129.583125 | -257.669114 |
| 1.05             | -128.635436 | 128.566304 | -257.20174  | -0.54091  | -0.990124 | 0.449214 | -128.096337 | 129.556428 | -257.652767 |
| 1.10             | -128.631234 | 128.531421 | -257.162655 | -0.476135 | -0.878529 | 0.402393 | -128.156594 | 129.40995  | -257.566543 |
| 1.15             | -128.626126 | 128.504974 | -257.1311   | -0.422186 | -0.782529 | 0.360344 | -128.205085 | 129.287503 | -257.492588 |
| 1.20             | -128.62056  | 128.484195 | -257.104755 | -0.384843 | -0.71055  | 0.325706 | -128.236632 | 129.194745 | -257.431376 |
| 1.30             | -128.608938 | 128.4578   | -257.066738 | -0.337905 | -0.607466 | 0.269561 | -128.27169  | 129.065266 | -257.336956 |
| 1.40             | -128.597788 | 128.447993 | -257.045781 | -0.315329 | -0.562407 | 0.247078 | -128.28307  | 129.0104   | -257.293469 |
| 1.50             | -128.587764 | 128.447976 | -257.03574  | -0.292253 | -0.509423 | 0.21717  | -128.296046 | 128.957399 | -257.253444 |
| 1.60             | -128.579249 | 128.454292 | -257.033541 | -0.274146 | -0.466755 | 0.192609 | -128.305588 | 128.921047 | -257.226635 |
| 1.70             | -128.572311 | 128.463911 | -257.036222 | -0.260342 | -0.433482 | 0.173141 | -128.312423 | 128.897393 | -257.209817 |
| 1.80             | -128.566823 | 128.47475  | -257.041573 | -0.249397 | -0.405867 | 0.156469 | -128.317859 | 128.880617 | -257.198475 |
| 1.90             | -128.562558 | 128.485542 | -257.0481   | -0.2409   | -0.383254 | 0.142354 | -128.322078 | 128.868796 | -257.190874 |
| 2.00             | -128.559275 | 128.495483 | -257.054758 | -0.234583 | -0.365389 | 0.130806 | -128.325106 | 128.860872 | -257.185978 |
| 2.10             | -128.55676  | 128.50409  | -257.06085  | -0.230006 | -0.351479 | 0.121473 | -128.327167 | 128.855569 | -257.182735 |
| 2.20             | -128.554839 | 128.511226 | -257.066065 | -0.226786 | -0.341056 | 0.11427  | -128.328463 | 128.852282 | -257.180746 |
| 2.30             | -128.55337  | 128.517041 | -257.070411 | -0.224441 | -0.332897 | 0.108456 | -128.32934  | 128.849938 | -257.179277 |

|      |             |            |             |           |           |          |             |            |             |
|------|-------------|------------|-------------|-----------|-----------|----------|-------------|------------|-------------|
| 2.40 | -128.552243 | 128.521538 | -257.073781 | -0.222832 | -0.326896 | 0.104064 | -128.32982  | 128.848434 | -257.178255 |
| 2.50 | -128.551372 | 128.525126 | -257.076498 | -0.221713 | -0.322477 | 0.100764 | -128.330068 | 128.847603 | -257.177671 |
| 2.60 | -128.550692 | 128.527943 | -257.078635 | -0.220927 | -0.319231 | 0.098304 | -128.330173 | 128.847174 | -257.177346 |
| 2.70 | -128.550157 | 128.530139 | -257.080296 | -0.220372 | -0.316855 | 0.096484 | -128.33019  | 128.846994 | -257.177185 |
| 2.80 | -128.549731 | 128.532014 | -257.081745 | -0.219965 | -0.315033 | 0.095069 | -128.330169 | 128.847047 | -257.177217 |
| 2.90 | -128.549388 | 128.53337  | -257.082758 | -0.219693 | -0.31378  | 0.094087 | -128.330097 | 128.84715  | -257.177246 |
| 3.00 | -128.549108 | 128.534447 | -257.083555 | -0.219521 | -0.31292  | 0.093399 | -128.329986 | 128.847367 | -257.177353 |
| 3.10 | -128.548878 | 128.535316 | -257.084194 | -0.219426 | -0.312356 | 0.09293  | -128.32985  | 128.847672 | -257.177522 |
| 3.20 | -128.548687 | 128.53602  | -257.084707 | -0.219386 | -0.312014 | 0.092628 | -128.329697 | 128.848034 | -257.177731 |
| 3.30 | -128.548526 | 128.536603 | -257.085129 | -0.219388 | -0.311837 | 0.09245  | -128.329533 | 128.84844  | -257.177974 |
| 3.40 | -128.548391 | 128.537084 | -257.085475 | -0.219416 | -0.311798 | 0.092383 | -128.329369 | 128.848882 | -257.178251 |
| 3.50 | -128.548275 | 128.537466 | -257.085741 | -0.21947  | -0.311827 | 0.092357 | -128.329196 | 128.849293 | -257.17849  |
| 3.60 | -128.548177 | 128.537794 | -257.085971 | -0.219536 | -0.311918 | 0.092381 | -128.32903  | 128.849712 | -257.178742 |
| 3.70 | -128.548092 | 128.538062 | -257.086154 | -0.219611 | -0.312037 | 0.092427 | -128.32887  | 128.850099 | -257.17897  |
| 3.80 | -128.54802  | 128.538277 | -257.086297 | -0.21969  | -0.31217  | 0.09248  | -128.328717 | 128.850447 | -257.179164 |
| 3.90 | -128.547957 | 128.538444 | -257.086401 | -0.219768 | -0.312307 | 0.092538 | -128.328575 | 128.850751 | -257.179325 |
| 4.00 | -128.547902 | 128.538583 | -257.086485 | -0.219845 | -0.312439 | 0.092595 | -128.328442 | 128.851022 | -257.179465 |

**Table S5:** IEA data for ArH<sup>+</sup> at the SCGV(2,3)/aug-cc-pVTZ level.

| Distances<br>Ar-H | E[TOT]      | T[TOT]     | V[TOT]       | E[I]      | T[I]      | V[I]     | E[QC]       | T[QC]      | V[QC]        |
|-------------------|-------------|------------|--------------|-----------|-----------|----------|-------------|------------|--------------|
| 1.00              | -526.905306 | 527.542213 | -1054.447519 | -0.557998 | -0.915894 | 0.357896 | -526.348667 | 528.458107 | -1054.806774 |
| 1.05              | -526.934359 | 527.381726 | -1054.316085 | -0.540141 | -0.905537 | 0.365396 | -526.395686 | 528.287263 | -1054.682949 |
| 1.10              | -526.954146 | 527.247392 | -1054.201538 | -0.517235 | -0.887868 | 0.370633 | -526.438456 | 528.13526  | -1054.573716 |
| 1.15              | -526.966914 | 527.134776 | -1054.10169  | -0.493914 | -0.870622 | 0.376708 | -526.474612 | 528.005398 | -1054.48001  |
| 1.20              | -526.974358 | 527.040195 | -1054.014553 | -0.463558 | -0.862979 | 0.399421 | -526.512413 | 527.903174 | -1054.415587 |
| 1.25              | -526.977824 | 526.960785 | -1053.938609 | -0.4482   | -0.849276 | 0.401076 | -526.531334 | 527.810061 | -1054.341395 |
| 1.26              | -526.978125 | 526.946589 | -1053.924714 | -0.445079 | -0.845584 | 0.400505 | -526.534772 | 527.792173 | -1054.326945 |
| 1.27              | -526.978314 | 526.932834 | -1053.911148 | -0.441623 | -0.84248  | 0.400857 | -526.53843  | 527.775314 | -1054.313744 |
| 1.28              | -526.978396 | 526.919435 | -1053.897831 | -0.438002 | -0.840017 | 0.402015 | -526.542144 | 527.759452 | -1054.301596 |
| 1.29              | -526.978379 | 526.906586 | -1053.884965 | -0.434325 | -0.838012 | 0.403687 | -526.545814 | 527.744598 | -1054.290412 |
| 1.30              | -526.978266 | 526.894228 | -1053.872494 | -0.430698 | -0.836262 | 0.405564 | -526.549339 | 527.73049  | -1054.279829 |
| 1.31              | -526.978066 | 526.882261 | -1053.860327 | -0.427092 | -0.834595 | 0.407503 | -526.552754 | 527.716856 | -1054.26961  |
| 1.32              | -526.977781 | 526.870719 | -1053.8485   | -0.423541 | -0.833043 | 0.409502 | -526.55603  | 527.703762 | -1054.259792 |
| 1.33              | -526.977418 | 526.859584 | -1053.837002 | -0.420049 | -0.831581 | 0.411532 | -526.559169 | 527.691165 | -1054.250334 |
| 1.34              | -526.976981 | 526.848843 | -1053.825824 | -0.416615 | -0.8302   | 0.413585 | -526.562175 | 527.679043 | -1054.241218 |
| 1.35              | -526.976474 | 526.838484 | -1053.814958 | -0.413238 | -0.82889  | 0.415652 | -526.565053 | 527.667374 | -1054.232427 |
| 1.40              | -526.973039 | 526.791986 | -1053.765025 | -0.397562 | -0.822022 | 0.42446  | -526.577343 | 527.614008 | -1054.191351 |
| 1.50              | -526.962971 | 526.721417 | -1053.684388 | -0.369094 | -0.81177  | 0.442676 | -526.595819 | 527.533187 | -1054.129006 |
| 1.60              | -526.950619 | 526.673771 | -1053.62439  | -0.34359  | -0.802886 | 0.459296 | -526.609001 | 527.476657 | -1054.085658 |
| 1.70              | -526.937486 | 526.642543 | -1053.580029 | -0.320414 | -0.790583 | 0.470169 | -526.619009 | 527.433126 | -1054.052135 |
| 1.80              | -526.924429 | 526.623303 | -1053.547732 | -0.299218 | -0.771634 | 0.472416 | -526.627074 | 527.394937 | -1054.022011 |
| 1.90              | -526.911921 | 526.612013 | -1053.523934 | -0.279443 | -0.746468 | 0.467025 | -526.634206 | 527.358481 | -1053.992687 |
| 2.00              | -526.900203 | 526.606491 | -1053.506694 | -0.261685 | -0.716885 | 0.4552   | -526.64011  | 527.323376 | -1053.963486 |

|      |             |            |              |           |           |           |             |            |              |
|------|-------------|------------|--------------|-----------|-----------|-----------|-------------|------------|--------------|
| 2.10 | -526.889397 | 526.605263 | -1053.49466  | -0.246036 | -0.686059 | 0.440023  | -526.64483  | 527.291322 | -1053.936152 |
| 2.20 | -526.879548 | 526.607394 | -1053.486942 | -0.23262  | -0.657133 | 0.424513  | -526.648302 | 527.264527 | -1053.912829 |
| 2.30 | -526.870664 | 526.612314 | -1053.482978 | -0.22124  | -0.63131  | 0.41007   | -526.65072  | 527.243624 | -1053.894344 |
| 2.40 | -526.862723 | 526.619673 | -1053.482396 | -0.211454 | -0.607509 | 0.396055  | -526.652499 | 527.227182 | -1053.879681 |
| 2.50 | -526.855685 | 526.629183 | -1053.484868 | -0.203082 | -0.582815 | 0.379733  | -526.653775 | 527.211998 | -1053.865773 |
| 2.60 | -526.849525 | 526.641183 | -1053.490708 | -0.193589 | -0.54993  | 0.356341  | -526.657016 | 527.191113 | -1053.848129 |
| 2.70 | -526.844105 | 526.655224 | -1053.499329 | -0.186024 | -0.501262 | 0.315238  | -526.659108 | 527.156486 | -1053.815594 |
| 2.80 | -526.839322 | 526.673672 | -1053.512994 | -0.176719 | -0.411451 | 0.234732  | -526.663545 | 527.085123 | -1053.748668 |
| 2.90 | -526.835543 | 526.692665 | -1053.528208 | -0.162029 | -0.302656 | 0.140627  | -526.67421  | 526.995321 | -1053.669531 |
| 3.00 | -526.832892 | 526.706013 | -1053.538905 | -0.150007 | -0.245156 | 0.095149  | -526.683408 | 526.951169 | -1053.634577 |
| 3.10 | -526.830859 | 526.716905 | -1053.547764 | -0.14096  | -0.205    | 0.06404   | -526.690321 | 526.921905 | -1053.612226 |
| 3.20 | -526.829272 | 526.725662 | -1053.554934 | -0.133861 | -0.173649 | 0.039788  | -526.695766 | 526.899311 | -1053.595077 |
| 3.30 | -526.828028 | 526.732754 | -1053.560782 | -0.128242 | -0.148171 | 0.019929  | -526.700096 | 526.880925 | -1053.581021 |
| 3.40 | -526.827049 | 526.738566 | -1053.565615 | -0.123805 | -0.127286 | 0.003481  | -526.703525 | 526.865852 | -1053.569377 |
| 3.50 | -526.826276 | 526.743183 | -1053.569459 | -0.120265 | -0.109914 | -0.010351 | -526.706272 | 526.853097 | -1053.559369 |
| 3.60 | -526.825664 | 526.746892 | -1053.572556 | -0.11741  | -0.095323 | -0.022087 | -526.708501 | 526.842215 | -1053.550716 |
| 3.70 | -526.825174 | 526.749857 | -1053.575031 | -0.115081 | -0.082983 | -0.032098 | -526.71033  | 526.83284  | -1053.54317  |
| 3.80 | -526.824781 | 526.752213 | -1053.576994 | -0.113157 | -0.072502 | -0.040655 | -526.711854 | 526.824715 | -1053.536569 |
| 3.90 | -526.824462 | 526.7541   | -1053.578562 | -0.11155  | -0.063587 | -0.047963 | -526.713135 | 526.817687 | -1053.530822 |
| 4.00 | -526.8242   | 526.755637 | -1053.579837 | -0.110319 | -0.056672 | -0.053647 | -526.7141   | 526.812309 | -1053.526409 |

**Table S6:** Chirgwin–Coulson coefficients along the potential energy curves of HeH<sup>+</sup>, NeH<sup>+</sup> and ArH<sup>+</sup>.

| Distance<br>He–H | closed-<br>shell | bonding | Distance<br>Ne–H | closed-<br>shell | bonding | Distance<br>Ar–H | closed-<br>shell | bonding |
|------------------|------------------|---------|------------------|------------------|---------|------------------|------------------|---------|
| 0.50             | 0.2484           | 0.7516  | 0.70             | 0.5804           | 0.4196  | 1.00             | 0.4934           | 0.5067  |
| 0.55             | 0.2883           | 0.7117  | 0.75             | 0.6090           | 0.3910  | 1.05             | 0.4904           | 0.5096  |
| 0.60             | 0.3144           | 0.6856  | 0.80             | 0.6223           | 0.3777  | 1.10             | 0.4857           | 0.5143  |
| 0.65             | 0.3338           | 0.6663  | 0.85             | 0.6337           | 0.3663  | 1.15             | 0.4820           | 0.5180  |
| 0.67             | 0.3360           | 0.6640  | 0.87             | 0.6347           | 0.3653  | 1.20             | 0.4833           | 0.5167  |
| 0.70             | 0.3450           | 0.6551  | 0.90             | 0.6405           | 0.3596  | 1.25             | 0.4816           | 0.5184  |
| 0.73             | 0.3553           | 0.6448  | 0.93             | 0.6466           | 0.3534  | 1.26             | 0.4808           | 0.5193  |
| 0.75             | 0.3621           | 0.6380  | 0.95             | 0.6505           | 0.3495  | 1.27             | 0.4802           | 0.5198  |
| 0.77             | 0.3695           | 0.6306  | 0.96             | 0.6515           | 0.3485  | 1.28             | 0.4798           | 0.5202  |
| 0.80             | 0.3811           | 0.6189  | 0.97             | 0.6532           | 0.3468  | 1.29             | 0.4797           | 0.5203  |
| 0.85             | 0.4016           | 0.5985  | 0.98             | 0.6553           | 0.3447  | 1.30             | 0.4797           | 0.5203  |
| 0.90             | 0.4191           | 0.5809  | 0.99             | 0.6580           | 0.3420  | 1.31             | 0.4798           | 0.5202  |
| 0.95             | 0.4344           | 0.5657  | 1.00             | 0.6611           | 0.3388  | 1.32             | 0.4799           | 0.5202  |
| 1.00             | 0.4501           | 0.5498  | 1.01             | 0.6647           | 0.3353  | 1.33             | 0.4800           | 0.5200  |
| 1.10             | 0.4801           | 0.5199  | 1.02             | 0.6686           | 0.3314  | 1.34             | 0.4802           | 0.5198  |
| 1.15             | 0.4952           | 0.5048  | 1.03             | 0.6726           | 0.3275  | 1.35             | 0.4804           | 0.5197  |
| 1.20             | 0.5109           | 0.4890  | 1.04             | 0.6772           | 0.3229  | 1.40             | 0.4816           | 0.5185  |
| 1.30             | 0.5443           | 0.4557  | 1.05             | 0.6824           | 0.3176  | 1.50             | 0.4863           | 0.5137  |
| 1.40             | 0.5841           | 0.4159  | 1.10             | 0.7175           | 0.2825  | 1.60             | 0.4934           | 0.5066  |

|      |        |        |      |        |        |      |        |        |
|------|--------|--------|------|--------|--------|------|--------|--------|
| 1.50 | 0.7464 | 0.2537 | 1.15 | 0.7502 | 0.2498 | 1.70 | 0.5014 | 0.4986 |
| 1.60 | 0.8310 | 0.1689 | 1.20 | 0.7762 | 0.2238 | 1.80 | 0.5097 | 0.4903 |
| 1.70 | 0.8825 | 0.1174 | 1.30 | 0.8142 | 0.1859 | 1.90 | 0.5185 | 0.4815 |
| 1.80 | 0.9189 | 0.0810 | 1.40 | 0.8282 | 0.1719 | 2.00 | 0.5279 | 0.4721 |
| 1.90 | 0.9448 | 0.0552 | 1.50 | 0.8545 | 0.1455 | 2.10 | 0.5388 | 0.4612 |
| 2.00 | 0.9620 | 0.0380 | 1.60 | 0.8807 | 0.1194 | 2.20 | 0.5522 | 0.4478 |
| 2.10 | 0.9736 | 0.0264 | 1.70 | 0.9048 | 0.0952 | 2.30 | 0.5695 | 0.4306 |
| 2.20 | 0.9815 | 0.0185 | 1.80 | 0.9266 | 0.0734 | 2.40 | 0.5919 | 0.4081 |
| 2.30 | 0.9869 | 0.0131 | 1.90 | 0.9448 | 0.0552 | 2.50 | 0.6204 | 0.3796 |
| 2.40 | 0.9907 | 0.0093 | 2.00 | 0.9592 | 0.0408 | 2.60 | 0.6559 | 0.3441 |
| 2.50 | 0.9934 | 0.0066 | 2.10 | 0.9701 | 0.0299 | 2.70 | 0.7018 | 0.2981 |
| 2.60 | 0.9954 | 0.0046 | 2.20 | 0.9781 | 0.0218 | 2.80 | 0.7652 | 0.2348 |
| 2.70 | 0.9967 | 0.0032 | 2.30 | 0.9841 | 0.0159 | 2.90 | 0.8360 | 0.1640 |
| 2.80 | 0.9977 | 0.0022 | 2.40 | 0.9885 | 0.0115 | 3.00 | 0.8787 | 0.1213 |
| 2.90 | 0.9985 | 0.0016 | 2.50 | 0.9917 | 0.0083 | 3.10 | 0.9089 | 0.0911 |
| 3.00 | 0.9990 | 0.0010 | 2.60 | 0.9941 | 0.0060 | 3.20 | 0.9320 | 0.0680 |
| 3.10 | 0.9993 | 0.0006 | 2.70 | 0.9958 | 0.0042 | 3.30 | 0.9496 | 0.0504 |
| 3.20 | 0.9996 | 0.0004 | 2.80 | 0.9971 | 0.0029 | 3.40 | 0.9628 | 0.0373 |
| 3.30 | 0.9998 | 0.0002 | 2.90 | 0.9980 | 0.0020 | 3.50 | 0.9726 | 0.0275 |
| 3.40 | 0.9999 | 0.0001 | 3.00 | 0.9987 | 0.0013 | 3.60 | 0.9799 | 0.0202 |
| 3.50 | 1.0000 | 0.0000 | 3.10 | 0.9991 | 0.0009 | 3.70 | 0.9852 | 0.0148 |
| 3.60 | 1.0000 | 0.0000 | 3.20 | 0.9994 | 0.0006 | 3.80 | 0.9892 | 0.0108 |
| 3.70 | 1.0000 | 0.0000 | 3.30 | 0.9996 | 0.0003 | 3.90 | 0.9922 | 0.0078 |
| 3.80 | 1.0000 | 0.0000 | 3.40 | 0.9998 | 0.0002 | 4.00 | 0.9943 | 0.0057 |
| 3.90 | 1.0000 | 0.0000 | 3.50 | 0.9999 | 0.0002 | -    | -      | -      |
| 4.00 | 1.0000 | 0.0000 | 3.60 | 0.9999 | 0.0000 | -    | -      | -      |
| -    | -      | -      | 3.70 | 0.9999 | 0.0000 | -    | -      | -      |
| -    | -      | -      | 3.80 | 1.0000 | 0.0000 | -    | -      | -      |
| -    | -      | -      | 3.90 | 1.0000 | 0.0000 | -    | -      | -      |
| -    | -      | -      | 4.00 | 1.0000 | 0.0000 | -    | -      | -      |
